# Supplementary material
Source: PubMed Central journal article supplement (PMC6082663)
Supplement: NIHMS963863-supplement-1.pdf [file NIHMS963863-supplement-1.pdf]

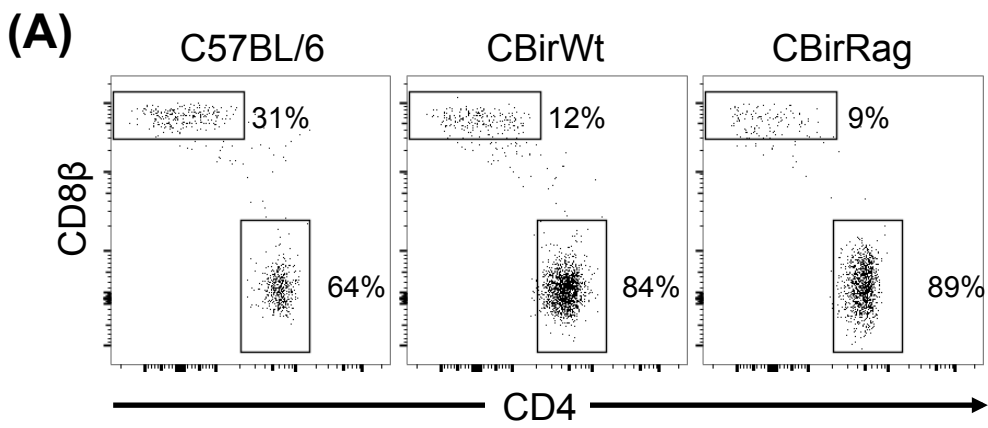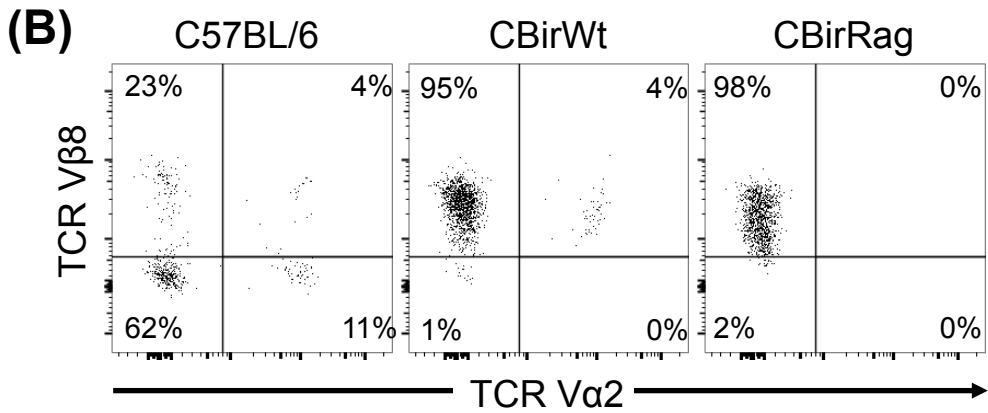

**Supplemental Figure 1 CBirRag and CBirWt mice carry both CD4<sup>+</sup> and CD8<sup>+</sup> T cells and CBirWT mice possess T cells that express non-transgenic TCR $\alpha$  chains.** Peripheral blood was isolated from CBirWt, CBirRag or C57BL/6 mice and stained for flow cytometry to measure **(A)** CD4 and CD8 $\beta$  expression on TCR $\beta$ <sup>+</sup>CD45<sup>+</sup> T cells or **(B)** TCR V $\alpha$ 2 and TCR V $\beta$ 8 expression on CD45<sup>+</sup>CD4<sup>+</sup> cells.

## Supplementary Figure 1

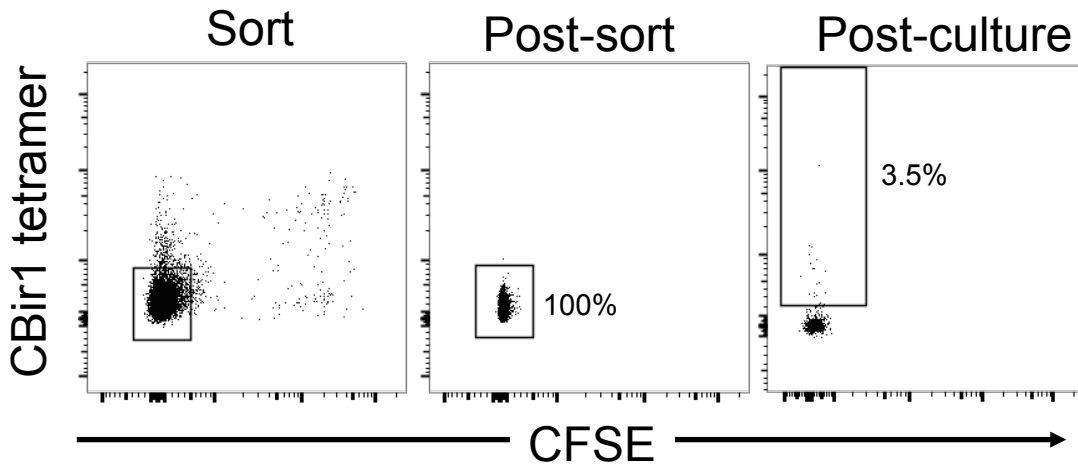

**Supplemental Figure 2 Rapidly proliferating CBirWt T cells do not re-express the CBir1 transgenic TCR upon overnight culture with IL-7.**  $1.5 \times 10^6$  FACS-sorted CFSE-labeled naïve  $CD4^+$  T cells from spleens and LNs of CBirWt mice were transferred to Rag1<sup>-/-</sup> recipients. Two weeks later, lymphocytes isolated from pooled recipient spleens and LNs were stained with MHCII CBir1 tetramer and FACS-sorted for CFSE<sup>+</sup>CBir1-CD45.1<sup>+</sup>CD4<sup>+</sup> T cells. Sorted cells were cultured overnight with 10ng/mL IL-7, stained with tetramer, and quantified for CBir1-specific TCR expression.

## Supplementary Figure 2

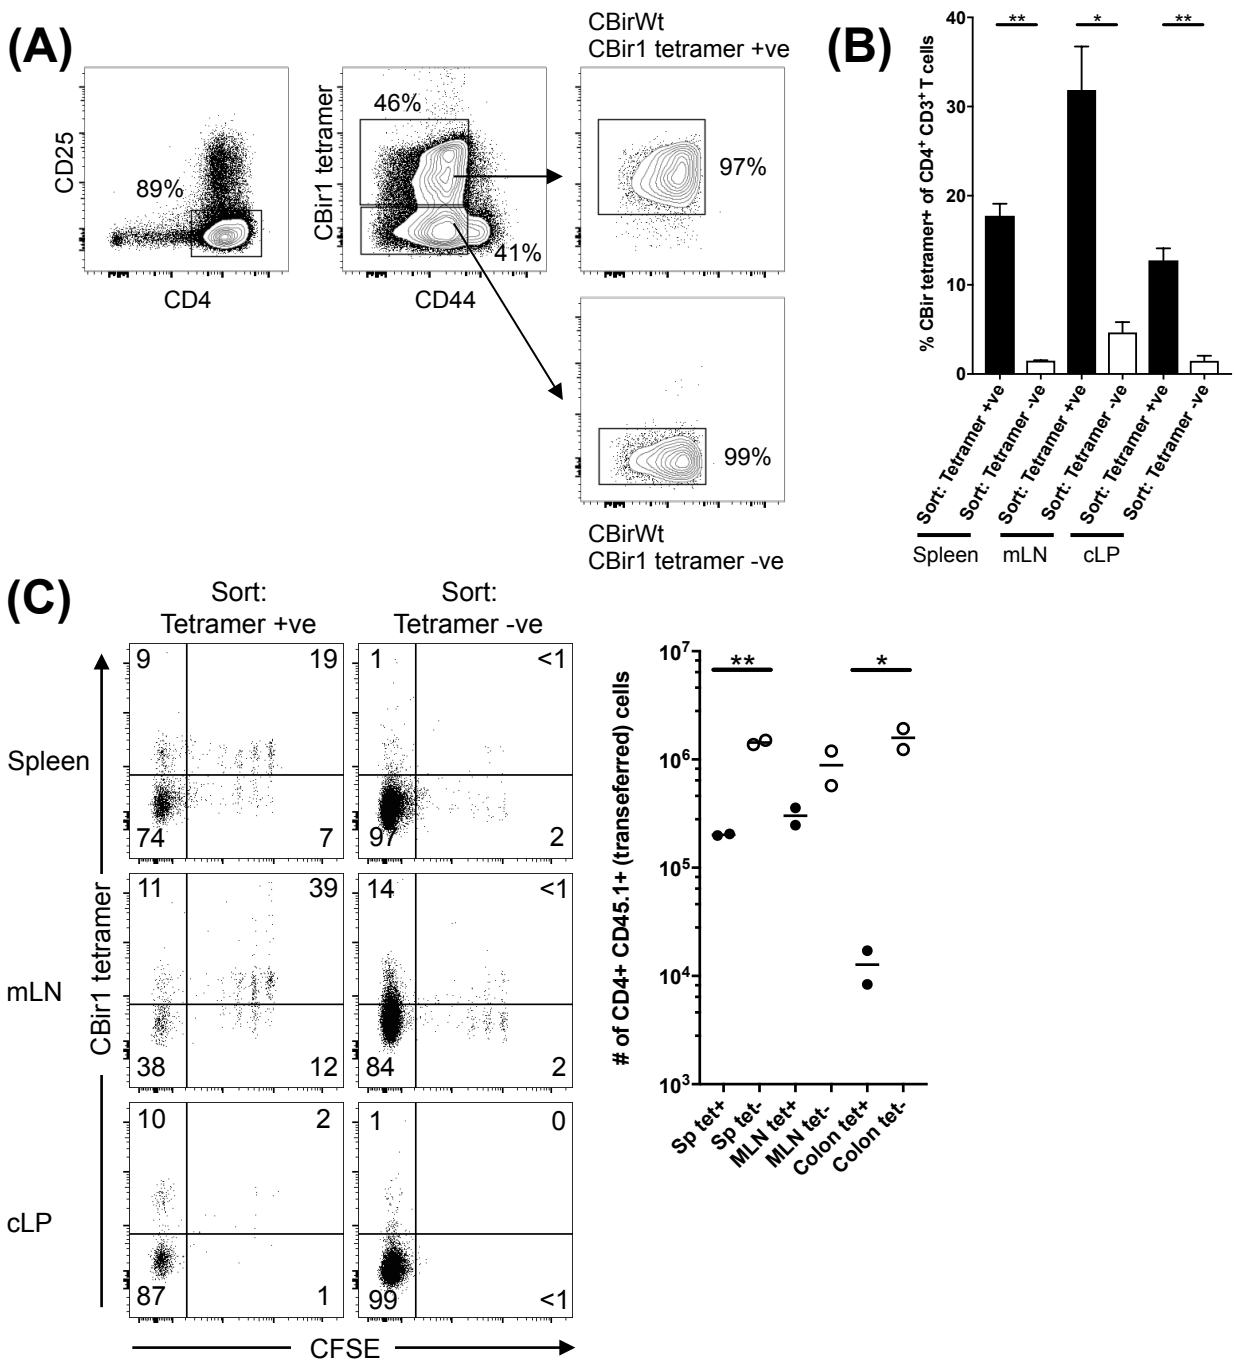

**Supplemental Figure 3 Lymphopenic conditions select for the outgrowth of cells expressing alternative TCR specificities that exclude the transgenic V $\alpha$  chain. (A)** CBir1 tetramer positive and negative CD4<sup>+</sup>CD44<sup>lo</sup>CD25<sup>-</sup> T cells from CBirWt mice were FACS-sorted, CFSE-labeled and transferred to sex-matched Rag1<sup>-/-</sup> mice. 13 days later, lymphocytes were isolated from spleens, mLNs and colonic LP of recipient mice and stained with CBir1 tetramer to determine **(B)** the percentage of tetramer positive transferred cells and **(C)** proliferation and accumulation of tetramer positive versus tetramer negative cells in each tissue. Flow cytometry plots were gated on Live CD45.1<sup>+</sup>CD90.2<sup>+</sup>CD4<sup>+</sup>CD8<sup>-</sup> cells; numbers represent percent of cells in each gate. Bar graph shows mean  $\pm$  SD.

## Supplemental Figure 3

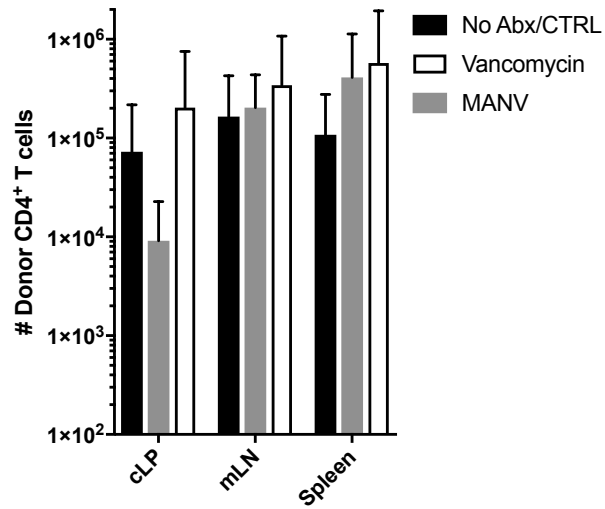

**Supplemental Figure 4 Accumulation of CBir1 T cells in the colon depends on an intact microbiota.** Lymphocytes of recipient mice from **Fig. 6A** were quantified for total number of donor CD4<sup>+</sup> T cells. Graph shows mean  $\pm$  SD.

## Supplementary Figure 4
